1 Title: **Signatures of vibration frequency tuning in human neocortex**

2

3

4

5

6 Lingyan Wang & Jeffrey M. Yau\*

7

8

9

10

11 Department of Neuroscience, Baylor College of Medicine, Houston, TX 77030 USA

12

13

14

15

16

17

18

19

20

Corresponding author: Jeffrey M. Yau  
One Baylor Plaza, T517  
Houston, TX 77030  
713-798-5150  
jeffrey.yau@bcm.edu

21

22

23

24

25

26

27

28

29

30

31

32

33

34

35

36

37

38

39

40

41

42

43

44

45

46

47

48

49

50

51

52 **ABSTRACT**

53 The spectral content of vibrations produced in the skin conveys essential information about  
54 textures and underlies sensing through hand-held tools. Humans can perceive and discriminate  
55 vibration frequency, yet the central representation of this fundamental feature is unknown. Using  
56 fMRI, we discovered that cortical responses are tuned for vibration frequency. Voxel tuning was  
57 biased in a manner that reflects perceptual sensitivity and the response profile of the Pacinian  
58 afferent system. These results imply the existence of tuned populations that may encode  
59 naturalistic vibrations according to their constituent spectra.

60

61

62

63

64

65

66

67

68

69

70

71

72

73

74

75

76

77

78

79

80

81

82

83

84

85

## 86 INTRODUCTION

87 Our physical interactions with the environment produce complex, high frequency (>85Hz)  
88 vibrations in the skin whose spectral content underlie the manual perception of surface textures  
89 (Bensmaia & Hollins, 2005; Manfredi et al., 2014) and support sensing through hand-held tools  
90 (Brisben, Hsiao, & Johnson, 1999; Miller et al., 2018). Vibration frequency, like sound pitch, is a  
91 fundamental feature that we perceive and discriminate (Bolanowski, Gescheider, Verrillo, &  
92 Checkosky, 1988; Convento, Rahman, & Yau, 2018; Mountcastle, Talbot, Sakata, & Hyvärinen,  
93 1969). Yet evidence for frequency-tuned somatosensory circuits remains conspicuously absent,  
94 in stark contrast to the tuning observed throughout the auditory neuraxis (Hudspeth, 2014; Saal,  
95 Wang, & Bensmaia, 2016; Wang, 2007). In human and non-human primates, vibration  
96 frequency is encoded in the periodicity of spiking activity of untuned cells in the peripheral  
97 afferent system (Johansson, Landstrom, & Lundstrom, 1982; Talbot, Darian-Smith, Kornhuber,  
98 & Mountcastle, 1968) and the earliest cortical processing stages (Harvey, Saal, Dammann 3rd,  
99 & Bensmaia, 2013; Lebedev & Nelson, 1996; Mountcastle et al., 1969). Conceivably, this  
100 temporal coding of vibration frequency gives rise to a rate-based representation in tuned  
101 populations, as seen in the auditory system (Saal et al., 2016; Wang, 2007). However,  
102 frequency-tuned somatosensory neurons have never been reported in primates and tuned cells  
103 were only recently discovered in the mouse somatosensory cortex (Prsa, Morandell, Cuenu, &  
104 Huber, 2019). The failure to establish frequency tuning in the primate brain may have been due  
105 to limited sampling of cortical territories or restricted exploration of vibrotactile stimulus space.

106

107 To search for vibration frequency tuning in the human brain, we performed whole brain  
108 functional magnetic resonance imaging (fMRI) as participants experienced a battery of  
109 vibrations on their hands while engaging in an attention-demanding frequency monitoring task  
110 (**Supplementary Fig. 1**). Vibrations, which were matched in perceived intensity, varied in  
111 frequency from 100 to 340Hz (**Supplementary Fig. 2**). We characterized voxel-level responses  
112 which reveal systematic tuning for vibration frequency. We compared voxel-tuning properties  
113 across participants and observed consistent tuning preferences that mirrored perceptual  
114 sensitivity and the response profile of the Pacinian afferent system. Lastly, we implemented an  
115 encoding model to provide an account for how voxel-level frequency tuning can relate to neural  
116 population responses.

117

## 118 RESULTS

119 We first defined brain regions whose blood oxygen level-dependent (BOLD) activity was  
120 modulated by vibration stimulation applied to the left or right hands (**Fig. 1a; Supplementary**  
121 **Fig. 3**) irrespective of vibration frequency. Response modulation associated with right hand  
122 stimulation was greater in strength ( $t(6) = 2.48$ ,  $P = 0.048$ ) and more prevalent ( $t(6) = 4.21$ ,  $P =$   
123  $0.0056$ ) compared to left hand responses. In both hemispheres of each participant, voxel  
124 responses were significantly modulated by vibrations delivered to the contralateral or ipsilateral  
125 hands ( $F$ -statistic: contralateral:  $7.67 \pm 0.86$ ; ipsilateral:  $7.37 \pm 0.75$ ). Response modulation  
126 associated with the contralateral and ipsilateral hands was similar in strength ( $t(6) = 2.28$ ,  $P =$   
127  $0.063$ ) and prevalence ( $t(6) = 1.12$ ,  $P = 0.30$ ).  
128

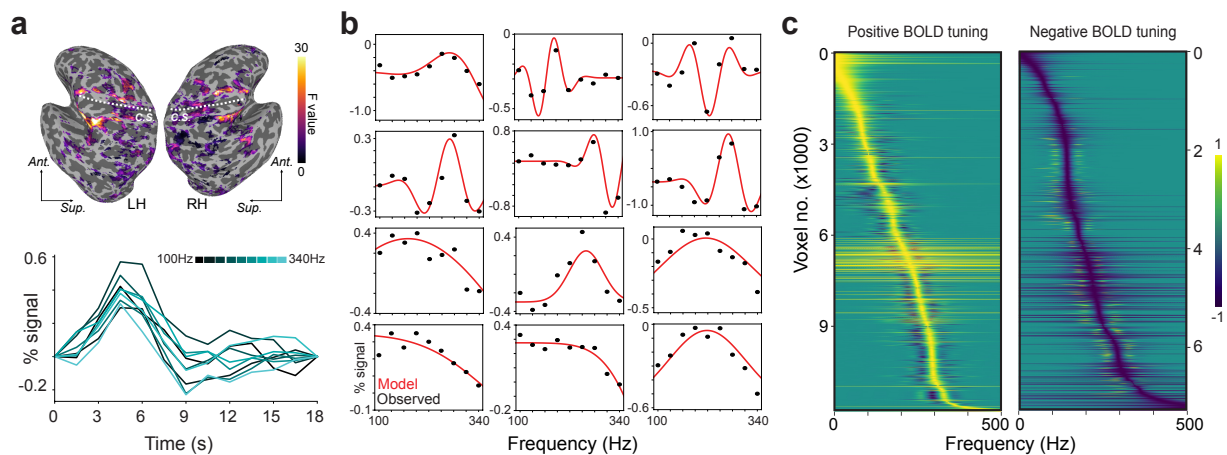

**Figure 1. Frequency tuning of cortical responses to vibrations.** (a) Vibrations delivered to the left or right hand are associated with significant BOLD signal modulation in an example participant's sensorimotor cortex. Dashed line indicates the central sulcus (c.s.) in the left hemisphere (LH) and right hemisphere (RH). BOLD signal time courses of an example voxel to different vibration frequencies follow stereotypical hemodynamic response profiles. Ant, anterior; Sup, superior. (b) Frequency tuning curves of example voxels (black dots indicate observed responses; red traces indicate fitted tuning functions). Frequency response patterns are consistent with Gabor tuning (top rows) or Gaussian tuning (bottom rows). (c) Normalized tuning curves for all frequency-selective voxels in example participant sorted by best modulating frequency (BF). Positive BOLD tuning voxels (left) exhibit signal increases at the BF while negative BOLD tuning voxels (right) exhibit signal decreases at the BF.

129 To characterize frequency-dependent modulation in vibration-responsive voxels (**Fig. 1b**), we  
130 fitted voxel-level response profiles with tuning functions (Materials and Methods). Tuning along  
131 a single dimension like temporal frequency can be modeled by fitting responses with simple  
132 Gaussian filters that parameterize the best modulating frequency (BF) and tuning sharpness.  
133 More complex frequency preferences can be modeled using Gabor filters that capture tuning  
134 profiles characterized by multiple modulation fields. Across participants,  $59 \pm 6.3\%$  of vibration-  
135 responsive voxels exhibited significant tuning (FDR-corrected  $q < 0.05$ ) that was described by  
136 the Gaussian model ( $r = 0.67 \pm 0.013$ ; range: 0.23-0.97) or Gabor model ( $r = 0.57 \pm 0.025$ ;

137 range: 0.36-0.95). Tuned voxels were predominantly found in parietal and frontal cortex  
138 (**Supplementary Fig. 4**). We performed model selection for each tuned voxel (Materials and  
139 Methods) and found that voxel profiles tended to be more consistent with Gaussian tuning  
140 rather than Gabor tuning (proportion of voxels consistent with Gabor tuning =  $0.40 \pm 0.12$ ). We  
141 compared the prevalence of Gaussian vs Gabor tuning in different sensorimotor regions under  
142 the assumption that simpler tuning could define primary sensory areas while more complex  
143 tuning could be confined to higher-order areas. Across regions, we observed similar proportions  
144 of tuned responses best described by the Gaussian and Gabor models (**Supplementary Fig.**  
145 **5**). That voxels characterized by Gaussian- and Gabor-shaped tuning are interspersed in  
146 parietal and frontal brain regions is inconsistent with the notion that simple frequency selectivity  
147 gives way to more complex tuning over a somatosensory cortical hierarchy.

148  
149 The number of tuned voxels in the left hemisphere ( $5685 \pm 3353$ ) and right hemisphere ( $5961 \pm$   
150  $3635$ ) did not differ significantly ( $t(6) = 1.35$ ,  $P = 0.23$ ) (**Supplementary Table 1**). While most  
151 tuned voxels were selective for only one hand, voxels tuned to contralateral and ipsilateral  
152 stimulation were observed in both hemispheres, and  $20.59 \pm 6.06\%$  of tuned voxels were  
153 selective for vibrations applied to either hand (**Supplementary Table 2**). Because contralateral  
154 and ipsilateral stimulation has been associated with BOLD signal increases and decreases  
155 (Schäfer et al., 2012), respectively, we tested whether tuned voxels were more likely to exhibit  
156 negative BOLD signal changes with ipsilateral stimulation. Voxels exhibited signal increases  
157 and decreases (**Fig. 1b**), but the likelihood for tuned voxels to deactivate at their BF did not  
158 differ between contralateral and ipsilateral stimulation across participants ( $t(6) = 1.08$ ,  $P = 0.32$ )  
159 or within each participant (z-statistic =  $-0.028$ – $0.23$ ,  $P = 0.81$ – $0.99$ ). For tuned voxels with  
160 positive or negative activity changes, frequency response profiles spanned the entire range of  
161 tested frequencies (**Fig. 1c**). These results imply the existence of cortical feature detectors that  
162 are selective for the frequency components comprising naturalistic vibrations (Manfredi et al.,  
163 2014).

164  
165 Having established voxel-level frequency tuning, we asked whether voxel preferences were  
166 biased to frequencies near 250Hz, the range corresponding to the maximum response  
167 sensitivity of the Pacinian afferent system (Bell, Bolanowski, & Holmes, 1994; Bolanowski &  
168 Verrillo, 1982; Johansson et al., 1982) and the peak perceptual sensitivity in humans  
169 (Bolanowski et al., 1988; Bolanowski & Verrillo, 1982). In each participant, BF distributions (**Fig.**  
170 **2a**) differed significantly from uniform (1-sample Kolmogorov-Smirnov test; all  $P < 1e-15$ ) with

171 more voxels preferring intermediate frequencies (BF:  $222 \pm 22$  Hz; range: 187-258 Hz)  
172 compared to lower and higher frequencies (**Supplementary Table 3**). We additionally tested  
173 whether voxels tuned for both hands had similar frequency preferences for the left and right  
174 hands (**Fig. 2b**), but BF values were uncorrelated between hands ( $r = -0.021 \pm 0.088$ ;  $t(6) = -$   
175  $0.58$ ,  $P = 0.58$ ). The finding that cortical frequency representations, which are maintained  
176 independently for the left and right hands, mirror the sensitivity profile of human observers and  
177 of the peripheral afferent system is consistent with efficient coding theory (Barlow, 1961).

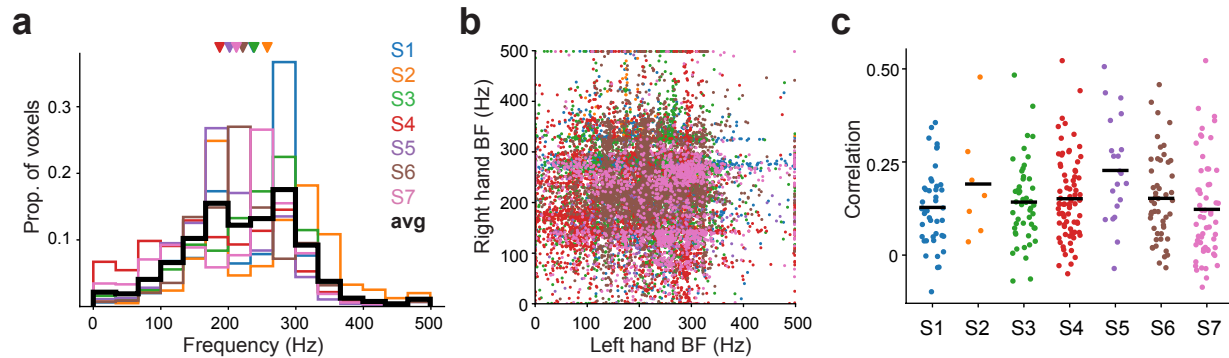

**Figure 2. Best modulating frequency distributions within participants, between hands, and across activation clusters.** (a) Distribution of best modulating frequency (BF) in each participant ( $N = 7$ ). Colors indicate individual participants. Average distribution is denoted in black. Triangles indicate mean BF in each participant. (b) Relationship between left hand BF and right hand BF in voxels tuned for both hands. Frequency preferences were uncorrelated over hands (mean  $r = -0.021 \pm 0.088$ ;  $t(6) = -0.58$ ,  $P = 0.58$ ). (c) Relationship between voxel locations and frequency preferences. Dots indicate correlation between the physical distances separating voxel pairs within an activation cluster and their BF differences. The average correlation for each participant is denoted by the black bar. Although correlations were generally positive, BF maps were unstructured and inconsistent with tonotopic organization.

178  
179 In the auditory cortical system, the spatial clustering of neurons with similar frequency  
180 preferences produces orderly tonotopic maps that are resolvable with fMRI (Barton, Venezia,  
181 Saberi, Hickok, & Brewer, 2012; Martino et al., 2015). We wondered whether an analogous  
182 topography, based on vibration frequency tuning, exists in the somatosensory cortical system.  
183 We first tested if the spatial proximity between pairs of frequency-tuned voxels within activation  
184 clusters related to the similarity of their frequency preferences (Materials and Methods). The  
185 physical distances between voxels were correlated with their BF differences (**Fig. 2c**) for left  
186 hand responses ( $r: 0.18 \pm 0.038$ ;  $t(6) = 11.30$ ,  $P = 2.87e-5$ ) and right hand responses ( $r: 0.14 \pm$   
187  $0.042$ ;  $t(6) = 8.41$ ,  $P = 0.00015$ ), implying that voxels with similar preferences tended to  
188 aggregate. This aggregation alone, however, is insufficient evidence for tonotopic organization  
189 because neighboring voxels could share frequency preferences simply due to spatial smoothing  
190 effects or the point-spread function of BOLD (Shmuel, Yacoub, Chaimow, Logothetis, & Ugurbil,

191 2007). Indeed, BF maps in each participant were generally disordered and lacked global  
192 structure (**Supplementary Fig. 4**). We further evaluated BF maps using a more conservative  
193 tonotopy definition that assumed frequency preferences within an activation cluster would be  
194 arranged in a gradient over the cortical surface (Materials and Methods). A mere 0.60% of the  
195 total activation clusters (2 out of 336 over all participants) comprised voxels with BFs spanning  
196 the full frequency range that were arranged in a gradient. The weak evidence for orderly  
197 tonotopic maps implies that frequency tuning does not define somatosensory cortical  
198 topography.

199

200 Because participants were all right-hand dominant (Edinburgh handedness scores:  $87 \pm 3.6$ )  
201 and they selectively attended to vibrations delivered to their right hands during the scans, we  
202 reasoned that response profiles may differ between hands. Such differences would presumably  
203 be reflected in the distributions of tuning model parameters, which were highly consistent across  
204 participants (**Supplementary Fig. 6**). Indeed, we observed greater response modulation with  
205 right hand responses (**Supplementary Fig. 6a**) ( $t(6) = 2.47$ ,  $P = 0.048$ ), although baseline  
206 activity levels were equivalent over the hands (**Supplementary Fig. 6b**) ( $t(6) = 1.63$ ,  $P = 0.16$ ).  
207 We predicted that right hand responses would be more frequency selective, but tuning widths  
208 did not differ between the hands (**Supplementary Fig. 6c**) ( $t(6) = 1.94$ ,  $P = 0.10$ ). For voxels  
209 best described by the Gabor model, we evaluated phase parameter distributions and found that  
210 phase distributions differed between hands in all participants (Watson's two-sample test of  
211 homogeneity;  $U^2 = 0.82-5.66$ ,  $P < 0.001$ ). Despite these differences, phase distributions were  
212 typically bimodal (Rayleigh test,  $P < 1e-15$ ) with prominent peaks at  $0.5\pi$  and  $1.5\pi$  that indicate  
213 a general tendency for tuning functions to comprise balanced positive and negative peaks  
214 (**Supplementary Fig. 6d**). Altogether, these analyses highlight the consistency of tuning  
215 patterns across participants and reveal differences between left and right hand tuning profiles  
216 that may be related to hand dominance or attention.

217

218 How might voxel-level tuning be related to cortical population activity? Vibrations delivered to  
219 the glabrous skin entrains the activity in some cortical populations and frequency could be  
220 represented by a spike timing code using these untuned but phase-locking neurons (Harvey et  
221 al., 2013; Lebedev & Nelson, 1996; Mountcastle et al., 1969). However, the frequency-response  
222 profiles of these neurons – characterized by spike rates that increase monotonically with  
223 frequency – are incompatible with voxel-level Gaussian and Gabor tuning, assuming the BOLD  
224 signal reflects aggregate population activity (Klink, Chen, Vanduffel, & Roelfsema, n.d.).

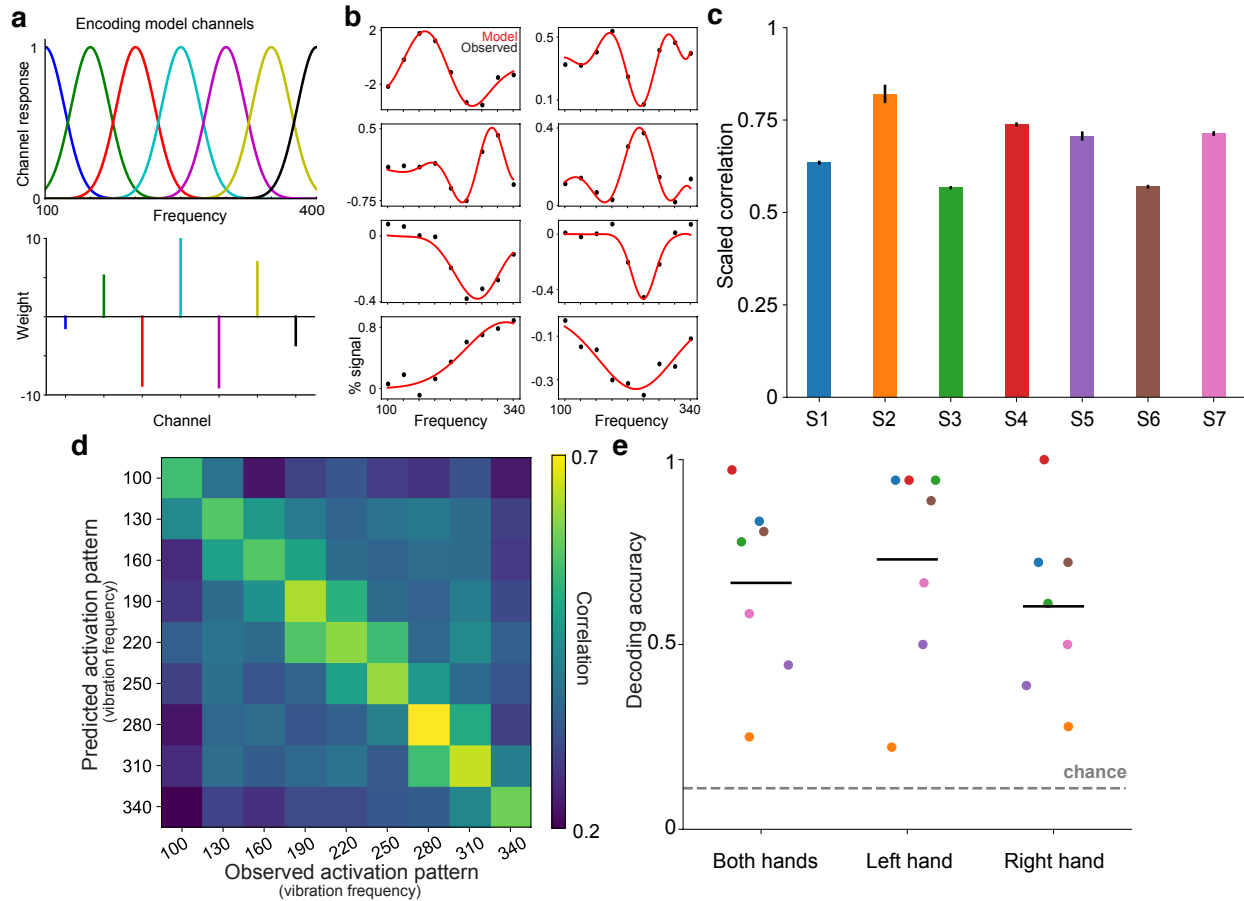

**Figure 3. Encoding model based on activity of putative frequency-tuned neural populations.** (a) Gaussian channels represent neural populations that respond selectively to different vibration frequencies. The encoding model assumes that a voxel's response to any given vibration frequency is the weighted sum of the activity in the channels. (b) Encoding model captures tuned response patterns in example voxels (black dots). Red curves indicate model-predicted responses profiles. (c) Bars indicate voxel-averaged scaled model performance within each participant. The model is trained on one fold of data and tested on a held-out fold. Model performance is the correlation between the model predictions and the test data, normalized by the correlation between the two folds of data (which represent the maximum correlation possible given the noise in the data). Error bars indicate s.e.m. (d) Correlation matrix indicates the similarity between multivoxel activation patterns predicted by the encoding model and observed patterns in the held-out data. Correlations are averaged over hands and participants. For decoding, an algorithm identifies the model-predicted pattern yielding the highest correlation with an observed pattern to infer the frequency condition. (e) Cross-validated decoding performance for both hands and each hand separately. Black line indicates group averaged accuracy. Colored dots indicate individual participants. Dashed line indicates chance performance.

225 Alternatively, vibration frequency could be carried in the activity of tuned populations, which  
 226 have recently been identified in mouse somatosensory cortex (Prsa et al., 2019). Phase-locking  
 227 responses are less prominent as one ascends the cortical hierarchy (Harvey et al., 2013), which  
 228 may reflect a transition to a rate-based code. As a proof of concept, we implemented an  
 229 encoding model to explore how the activity of tuned populations could relate to voxel-level  
 230 responses (Materials and Methods). We assumed that a voxel's response reflects the weighted



231 combination of activity in neural populations selective for different frequencies (**Fig. 3a**). These  
232 encoding models recapitulated observed voxel profiles (**Fig. 3b**) and accounted for substantial  
233 response variance (**Fig. 3c**; scaled goodness-of-fit:  $0.68 \pm 0.086$ ). We also verified that the  
234 encoding models captured voxel tuning by performing a decoding analysis (Materials and  
235 Methods). The models predicted multivoxel activity patterns that closely resembled observed  
236 patterns (**Fig. 3d**). Accordingly, a simple decoder (**Fig. 3e**) identified the frequencies associated  
237 with different measured patterns with an accuracy ( $67\% \pm 23\%$ ) far exceeding chance  
238 performance ( $11\%$ ) ( $t(6) = 5.82$ ,  $P < 0.0011$ ). Lastly, we considered how phase-locking  
239 populations could contribute to voxel responses and found that voxel tuning could be  
240 recapitulated only if the phase-locking neurons exhibited some degree of frequency selectivity  
241 (**Supplementary Fig. 7**). These modeling results confirm that frequency information is carried in  
242 voxel responses and provide a conceptual framework for relating voxel tuning to frequency-  
243 selective neural populations.

244

## 245 **DISCUSSION**

246 We find that voxel-level BOLD signals are modulated by vibrations in a manner that clearly  
247 reflects frequency selectivity. Voxel tuning spans the range of frequencies that are relevant for  
248 fine texture perception (Bensmaia & Hollins, 2005; Manfredi et al., 2014). Frequency  
249 preferences are consistent across individuals and systematic with a greater share of voxels  
250 preferring frequencies that optimally drive the Pacinian afferent system (Bell et al., 1994;  
251 Bolanowski & Verrillo, 1982; Johansson et al., 1982). This cortical bias may underlie our  
252 enhanced perceptual sensitivity for vibrations near 250Hz (Bolanowski et al., 1988; Bolanowski  
253 & Verrillo, 1982). Our finding that cortical representations mirror environmental statistics,  
254 peripheral afferent profiles, and perceptual sensitivity is consistent with the predictions of  
255 efficient coding theory (Barlow, 1961).

256

257 Conceivably, frequency-tuned voxel activity reflects neurons in the primate somatosensory  
258 cortical system that are analogous to vibration selective cells recently identified in mice.  
259 Importantly, although individual neurons in mouse somatosensory cortex exhibit vibration tuning  
260 (Prsa et al., 2019), such neurons have never been reported in the primate brain. Limited  
261 sampling of cortical populations and territories may have obscured the presence of frequency-  
262 tuned neurons. Alternatively, frequency tuning may be a property that only emerges at a  
263 population level in primates. Arbitrating between these possibilities will require large scale  
264 neurophysiological recordings, which can be guided by our neuroimaging findings.

265

266 Future studies will also need to address the mechanisms that generate frequency selectivity in  
267 the somatosensory system: Our data reveal frequency selective cortical responses despite the  
268 absence of fine tuning in peripheral and subcortical processing stages. This contrasts with the  
269 auditory system, where frequency tuning exists throughout the neuraxis, even at the receptor  
270 level (Hudspeth, 2014). Cortical tuning may reflect the central convergence of submodality  
271 signals that are initially carried by distinct populations in the peripheral afferent system (Pei,  
272 Denchev, Hsiao, Craig, & Bensmaia, 2009; Saal & Bensmaia, 2014; Saal, Harvey, & Bensmaia,  
273 2015). In fact, recent evidence has challenged the traditional functional dichotomy between  
274 Pacinian and non-Pacinian perceptual channels by positing a universal frequency decoding  
275 system (Birznieks et al., 2019). Beyond submodality convergence, varying distributions of  
276 excitatory and inhibitory neurons may also underlie the diversity of frequency-selective  
277 population responses across sensory cortex (Hughes et al., 2021). At a cellular level, short term  
278 synaptic depression may impose a frequency dependent filter on information transmission  
279 (Rosenbaum, Rubin, & Doiron, 2012) and mediate the conversion from temporal coding to rate  
280 coding (Lee, Wang, & Bendor, 2020).

281

282 Regardless of the mechanism, our data reveal somatosensory cortical activity in human  
283 neocortex that is tuned for vibration frequency. Analogous frequency encoding schemes in the  
284 somatosensory and auditory systems may facilitate the extensive crosstalk between touch and  
285 audition in the temporal frequency domain (Crommett, Madala, & Yau, 2019; Crommett, Perez-  
286 Bellido, & Yau, 2017; Yau, Olenczak, Dammann, & Bensmaia, 2009; Yau, Weber, & Bensmaia,  
287 2010). Moreover, frequency-selective cortical filters offer an efficient scheme for representing  
288 the complex spectra of vibrations encountered in naturalistic touch.

289

## 290 **MATERIALS AND METHODS**

291 **Participants.** Seven healthy adult volunteers (5 females; mean age  $\pm$  SD:  $26 \pm 2.8$  years; aged  
292 20-29 years) participated in the study. All participants were right-handed (Oldfield, 1971)  
293 (Laterality quotient:  $87.1 \pm 9.7$ ). The sample size was set on the basis that any significant and  
294 consistent outcomes established in 7 out of 7 subjects would be statistically generalizable  
295 according to a 2-tail binomial test ( $P < 0.05$ ). Participants had normal or corrected-to-normal  
296 vision. Testing procedures were approved by the Baylor College of Medicine Institutional Review  
297 Board. All participants provided written consent and were paid for their participation or waived  
298 payment.

299

300 **MRI acquisition.** All scans were conducted in the Core for Advanced MRI (CAMRI) at Baylor  
301 College of Medicine. MRI data were acquired on a 3-Tesla MAGNETOM Trio scanner with  
302 Prisma fit (Siemens, Erlangen, Germany) using a 64-channel head coil. Anatomical data were  
303 acquired using a T1-weighted magnetization prepared rapid acquisition gradient echo sequence  
304 (MPRAGE; TR = 2300 ms; TE = 2.98 ms; flip angle = 9°; 1 mm<sup>3</sup> voxels). Functional data were  
305 obtained using an axial echo-planar imaging (EPI) sequence with simultaneous multi-slice  
306 (SMS) acceleration (TR = 1500 ms; TE = 33 ms; flip angle = 90°; GRAPPA factor = 2; SMS  
307 factor = 3; FOV = 192 mm; 69 slices; 2 mm<sup>3</sup> voxels; 380 volumes per scan) that covered all of  
308 the cortical volume and part of the cerebellum. Each participant underwent 12 functional scans  
309 (~9.5min/scan) divided across 2 sessions (5.9 +/- 7.4 days inter-session interval).

310

311 **Tactile stimulation.** Vibrotactile cues were delivered to the distal pad of the participant's left  
312 and right index fingers using an MRI-compatible piezoelectric tactor (Engineering Acoustics,  
313 Inc., Casselberry, FL). Tactors were fastened to the distal finger pads with self-adherent  
314 cohesive wrap bandages. Tactors were controlled using the EAI Tactor Development Kit and  
315 stimulus timing was determined using custom Matlab scripts. The vibration set comprised 9  
316 frequencies: 100, 130, 160, 190, 220, 250, 280, 310, and 340Hz. Vibrations were matched in  
317 perceived intensity with amplitudes (gain: 71.4–97.4 arbitrary units according to EAI controller)  
318 determined in preliminary behavioral experiments using the method of adjustment. To further  
319 ensure that participants attended to vibration frequency rather than intensity during the scans,  
320 we applied a random ±5% jitter in amplitude on each stimulus presentation. Offline, we  
321 measured vibration amplitudes (unloaded) using a laser displacement sensor (ZX2-LD50,  
322 Omron, Hoffman Estates, IL) (displacement range: 0.414–0.504mm) and confirmed tactor  
323 reliability (**Supplementary Fig. 2**).

324

325 **Frequency monitoring task and scans.** Participants were scanned in an event-related design  
326 as they performed a vibration frequency monitoring (oddball detection) task (Perez-Bellido,  
327 Barnes, Crommett, & Yau, 2017) while maintaining visual fixation. Each scan comprised  
328 unimanual and bimanual events. An event comprised a series of 3 vibration stimuli (stimulus  
329 duration: 700ms; inter-stimulus interval: 300ms). On the majority of events (*regular events*; 66/76  
330 in each scan corresponding to 2 repetitions each of 9 right hand frequencies, 9 left hand  
331 frequencies, and 15 bimanual frequency combinations), the frequency of the three vibrations was  
332 identical. All of the analyses included in this report were based on the unimanual regular events.

333 On a subset of events (*oddball events*; 10/76 in each scan), the frequency of the second vibration  
334 differed from the first and third vibrations in the series (frequency difference: 120-240Hz).  
335 Participants were instructed to report the occurrence of oddball events using a foot pedal  
336 response (Current Designs, Philadelphia, PA). Reliable detection of oddball events  
337 (**Supplementary Fig. 1**) indicated that participants attended to vibration frequency. The  
338 responding foot was counter-balanced across sessions over participants. To control for spatial  
339 attention effects, oddball events only occurred on the right hand (on unimanual and bimanual  
340 events) such that attention was directed toward each subject's dominant hand throughout the  
341 scan. Events were separated by 3, 4.5, 6, or 7.5-s intervals with order and timing determined  
342 pseudo-randomly using Optseq2 (<http://surfer.nmr.mgh.harvard.edu/optseq>).

343

344 **Behavioral analysis.** Given the unequal number of oddball and regular events, we quantified  
345 oddball detection performance by computing an  $F_1$  score for each subject (Powers, 2011):

346

$$347 \quad F_1 = 2 * \frac{(\text{Precision} * \text{Recall})}{\text{Precision} + \text{Recall}}$$

348

349 where *Precision* is defined as the number of hits (correctly detected oddball events) divided by  
350 the sum of hits and false alarms (events incorrectly identified as oddball) and *Recall* is defined as  
351 the number of hits divided by the sum of hits and misses (oddball events not detected).  $F_1$  scores  
352 range from 0–1 with higher scores indicating better performance. For each subject, we determined  
353 if the observed  $F_1$  score was greater than that expected by chance (**Supplementary Fig. 1**) by  
354 generating a null distribution of  $F_1$  scores assuming the observed number of positive responses  
355 with shuffled event labels over 1000 permutations.

356

357 **fMRI analyses.** Data preprocessing and first-level analyses were performed using AFNI (Cox,  
358 1996). Each participant's data were preprocessed using standard procedures (*afni\_proc.py*)  
359 including: (i) slice timing correction (*3dTshift*); (ii) image co-registration (*align\_epi\_anat.py*); (iii)  
360 functional image alignment (*3dvolreg*); (iv) spatial blurring with a 4-mm FWHM filter (*3dmerge*);  
361 (v) mean-normalization of each voxel's signal (*3dcalc*). Preprocessed voxel-wise data were  
362 modeled using multiple linear regression (*3dDeconvolve*): general linear models (GLM)  
363 comprised 34 regressors corresponding to left hand stimulation (9 frequencies), right hand  
364 stimulation (9 frequencies), 15 bimanual conditions, and oddballs. Each regressor was created  
365 using a gamma-variate convolution kernel. The GLM comprised head motion and drift parameters

366 as nuisance regressors. GLM coefficients were taken as the voxel response associated with each  
367 condition. A single GLM was fitted to the whole 12-scan dataset to define the analysis mask  
368 comprising voxels whose activity was modulated by either left hand or right hand stimulation. For  
369 the tuning models and encoding model analyses, separate GLMs were fitted after dividing the full  
370 dataset into 2 folds corresponding to the 6 scans from each scanning session. Unless otherwise  
371 noted, analyses were performed in native volume space. For displaying purposes, each  
372 participant's data were projected into surface space. Surface models were constructed from each  
373 participant's anatomical scans using Freesurfer (Dale, Fischl, & Sereno, 1999). The analysis  
374 exploring the topographic organization of frequency preferences was performed in native surface  
375 space.

376

377 In each participant, we defined an analysis mask by identifying voxels whose activity was  
378 modulated by either left hand or right hand stimulation. For each hand separately, an omnibus F-  
379 statistic was computed to quantify the significance of each voxel's responses to the 9 vibration  
380 frequencies. The full analysis mask was the union of the left hand and right hand F-statistic maps,  
381 thresholded at a false discovery rate (FDR) corrected  $q < 1e-4$  over the whole brain.

382

383 **Vibration frequency tuning functions.** To test for vibration frequency tuning, we fitted  
384 parametric tuning functions to each voxel's frequency response profiles estimated from the 2  
385 data folds. If a voxel's response profiles were inconsistent over the folds, a tuning model fit to  
386 these data would be meaningless. Accordingly, we only fit tuning functions to voxels whose  
387 across-fold Pearson correlation exceeded 0.2. For voxels with consistent profiles across folds,  
388 we fitted simple and complex tuning functions and performed model competition to determine  
389 the model most appropriate for each voxel given its complexity and performance. Models were  
390 fitted to each voxel's response data using the method of least squares which minimized the  
391 error between observed and predicted data. Responses to left and right hand stimulation were  
392 considered separately.

393

394 To capture simple frequency tuning, we assumed a voxel's response profile was characterized  
395 by a Gaussian function:

396

$$397 \quad r = Ae^{\frac{-0.5(f-\mu)^2}{\sigma^2}} + b$$

398

399 where  $r$  is the predicted voxel response to a vibration with frequency  $f$ ,  $A$  is a gain term,  $\mu$  is the  
400 best modulating frequency,  $\sigma$  is the tuning width, and  $b$  indicates the baseline activity level over  
401 all frequencies. The Gaussian model comprised 4 free parameters.

402

403 To capture more complex frequency tuning patterns, we assumed a voxel's response profile  
404 was characterized by a Gabor function, a cosine wave modulated by a Gaussian window:

405

$$406 \quad r = Ae^{\frac{-0.5(f-\mu)^2}{\sigma^2}} \cos\left(\frac{2\pi}{\lambda}(f - \mu) + \phi\right) + b$$

407

408 where  $r$  is the predicted voxel response to a vibration with frequency  $f$ ,  $A$  is a gain term,  $\mu$  is the  
409 center of the Gaussian,  $\sigma$  is the spread of the Gaussian,  $\lambda$  and  $\phi$  are the wavelength and phase  
410 of the wave, and  $b$  indicates the baseline activity level over all frequencies. The Gabor model  
411 comprised 6 free parameters. In preliminary analysis, we found that estimating  $\lambda$  with no  
412 constraints could yield small wavelength values that reflected the noise in the data. Accordingly,  
413 we constrained  $\lambda$  by requiring the  $\lambda\sigma$  ratio to be  $>2.25$  in the final analysis.

414

415 To determine whether a voxel's responses were better captured by the Gaussian or Gabor  
416 models, we compared models using Akaike information criterion (AIC) (Burnham & Anderson,  
417 2004):

418

$$419 \quad AIC = n * \ln(RSS) + 2k$$

420

421 where  $n$  is the number of data points used to fit the models,  $RSS$  is the residual sum of squared  
422 errors, and  $k$  is the number of free parameters. The AIC-preferred model of each voxel was  
423 taken as that which yielded the smaller AIC value. We then computed the correlation between  
424 the AIC-preferred model predictions and the observed data to quantify goodness-of-fit. Voxels  
425 were considered to be tuned if the correlation between model predictions and observed data  
426 was statistically significant after correcting for the number of modeled voxels (FDR corrected  $q <$   
427  $0.05$  using the Benjamini-Hochberg procedure).

428

429 We evaluated a number of features defining voxel tuning curves (**Supplementary Fig. 6**). We  
430 defined the peak of a tuning function as the curve portion corresponding to the greatest  
431 (modulus) response modulation. Best modulating frequency (BF; 1-500 Hz) was the  $\mu$

432 parameter for Gaussian models or the frequency corresponding to the peak for Gabor models.  
433 The gain term indicated the (unsigned) magnitude of response modulation. The baseline  
434 parameter represented basal activity common to all frequencies. Tuning sign (positive or  
435 negative) corresponded to direction of activity change relative to the baseline level at the peak.  
436 The full width at half maximum (FWHM) along the peak indicated the tuning selectivity of each  
437 voxel.

438

439 **Voxel-wise encoding models.** We implemented a simple channel encoding model to predict  
440 voxel-level activity by assuming the existence of frequency-tuned cortical neurons like those  
441 recently identified in mouse somatosensory cortex (Prsa et al., 2019). We modeled the  
442 normalized activity levels ( $R$ ) of a cortical population in response to a vibration with frequency  $f$   
443 using a Gaussian channel:

444

$$445 \quad R = e^{-\frac{(f-\mu)^2}{2\sigma^2}}$$

446

447 where  $\mu$  is the population's BF and  $\sigma$  is the channel tuning width. We assumed a voxel  
448 comprises different populations with unique frequency preferences, so the full encoding model  
449 predicted a voxel's response ( $r$ ) as a linear combination of activity from multiple populations:

450

$$451 \quad r = \sum_{i=1}^{\#ch} w_i R_i$$

452

453 where  $R_i$  is the normalized activity of the  $i^{\text{th}}$  population and  $w_i$  is a weight that describes the  
454 population's contribution to the voxel's overall response. We modeled each voxel using 7  
455 channels with predefined BF values. Accordingly, an encoding model was fitted to the response  
456 profiles of each tuned voxel by estimating the channel weights and a tuning width parameter  
457 that was shared over all the channels. Model fitting was performed using 2-fold cross-validation.  
458 Parameters were estimated using the method of least squares to minimize the error between  
459 model predictions and the tuning curve describing one data fold. Model performance was  
460 computed as the Pearson correlation between the model predictions and the data in the second  
461 fold. The final goodness-of-fit was the cross-validated model performance averaged over the  
462 two folds. Because the cross-validated goodness-of-fit depends on the consistency of the two  
463 folds, we normalized model performance by the across-fold correlation and report scaled

464 correlations. For voxels tuned to both hands, separate models were fitted to explain left hand  
465 and right hand responses.

466

467 In separate analyses, we considered how voxel level activity may be related to phase-locking  
468 neurons that have been identified in non-human primates (Harvey et al., 2013; Lebedev &  
469 Nelson, 1996; Mountcastle et al., 1969) (**Supplementary Fig. 7**). We reasoned that the total  
470 spiking activity of these neurons would be minimal at low vibration frequencies and grow with  
471 increases in vibration frequency. Importantly, phase-locking neurons would fail to respond on  
472 every stimulus cycle at high vibration frequencies because of neural refractoriness, so  
473 population firing rates would saturate. We modeled this ramp-to-plateau response profile of a  
474 neural population using a rectified linear unit (ReLU) as a channel in our encoding model:

475

$$476 \quad R(s) = s(f - f_0)$$

477

478 where  $R(s)$  is the normalized population activity to a vibration with frequency  $f$ ,  $s$  is a slope  
479 parameter describing the relationship between population activity and frequency, and  $f_0$  is the  
480 lowest frequency at which the population responds (set to 1Hz). Because neural activity  
481 depends on vibration amplitude (Harvey et al., 2013) and populations can differ in their  
482 sensitivity to vibration amplitude, we modeled different populations (i.e., channels) as rectified  
483 linear units with different slopes. Note that by allowing the channels to have different slopes, we  
484 assume that neural populations in a voxel respond differentially over vibration frequencies  
485 thereby building frequency tuning into the model. The full encoding model, then, predicted a  
486 voxel's response ( $r$ ) as a linear combination of activity from multiple populations:

487

$$488 \quad r = \sum_{i=1}^{\#ch} w_i R(s_i)$$

489

490 where  $R(s_i)$  is the normalized activity of the  $i^{th}$  population defined by slope  $s_i$  and  $w_i$  is a weight  
491 that describes the population's contribution to the voxel's overall response. We assumed each  
492 voxel comprised 8 populations with predefined slopes. The ReLU models were trained and  
493 tested in the same manner as the Gaussian channel model.

494

495 We implemented a simple decoder using the encoding models to verify further that the models  
496 captured the frequency response profiles of the voxels. The decoding analysis included only the



497 voxels with significant encoding model performance ( $P < 0.05$ ). Using the encoding models  
498 fitted to one data fold, we generated multivoxel activity patterns for each vibration frequency.  
499 These patterns served as labeled templates against which the observed multivoxel activity  
500 patterns in the other data fold could be compared. For decoding, we computed the correlations  
501 between an observed activation pattern and each of the template patterns predicted with the  
502 encoding models. The template pattern yielding the maximum correlation was taken as the  
503 decoded frequency. For each participant, decoding performance was the accuracy averaged  
504 over the two folds. Because distinct voxel sets exhibited tuning for left and right hand  
505 stimulation, the encoding and decoding analyses were performed separately for each hand.  
506

507 **Topography analysis.** We performed two analyses to establish evidence for a topographic  
508 organization based on voxel frequency preferences. We first tested whether the physical  
509 distance (in volume space) between pairs of voxels related to the similarity of their BFs. For  
510 each participant, this analysis was performed within activation clusters (minimum cluster size =  
511 40 voxels). For each cluster, we defined  $\overrightarrow{\Delta d}$  as a vector of distances between each pair of  
512 voxels and  $\overrightarrow{\Delta BF}$  as a vector of pairwise voxel BF differences. We computed the correlation  
513 between  $\overrightarrow{\Delta d}$  and  $\overrightarrow{\Delta BF}$  for each activation cluster. At the group level, we tested whether the  
514 average (within participant) correlation over clusters differed significantly from 0.  
515

516 The second analysis tested whether frequency preferences within activation clusters were  
517 arranged in a gradient pattern over the cortical surface (minimum cluster size: 60 surface  
518 nodes). Two conditions needed to be met in order for an activation cluster to be considered  
519 tonotopic. First, the cluster needed to contain nodes with BFs that spanned the full frequency  
520 range. For each cluster, we binned BF values from 50–450 Hz in 50-Hz steps. We only further  
521 considered clusters that had at least one node in each BF bin. Second, BF values within a  
522 cluster were required to be systematically arranged. For each cluster, we defined an axis that  
523 passed through the cluster's center. We then projected each node's BF onto the axis and  
524 performed linear regression between the BF values and node locations along the axis. A  
525 significant linear regression fit indicated that BFs were ordered in a gradient along the axis.  
526 Because we were agnostic to the orientation of potential BF gradients, we defined repeated the  
527 analysis along 4 axes ( $0^\circ$ ,  $45^\circ$ ,  $90^\circ$ , and  $135^\circ$ ) for each cluster.  
528

529 **Statistical analysis.** Statistical analyses in this paper include Pearson correlation, pair-wise t  
530 test, one-sample t test, one-sample Kolmogorov-Smirnov uniformity test, and the two-sample

531 independent proportions test. For circular data, we performed the Rayleigh uniformity test and  
532 Watson's two-sample test of homogeneity. All tests were performed using Python 3.7 or R 3.5.1.

533

### 534 **ACKNOWLEDGEMENTS**

535 This work was supported by R01NS097462 (JMY). We acknowledge BCM's Core for Advanced  
536 MRI (CAMRI) and the Computational and Integrative Biomedical Research Center (CIBR). We  
537 thank Md. Shoaibur Rahman with data collection. We thank Nuo Li, Mike Beauchamp, Yue  
538 Zhang, and Meghan Robinson for helpful feedback and technical support. We thank Jing Lin for  
539 help with vibrometry and James Romesberg for assistance with constructing the foot pedal. We  
540 are grateful to Yau Lab members for helpful discussions.

541

### 542 **AUTHOR CONTRIBUTIONS**

543 J.M.Y. designed the experiment. L.W. collected the data. L.W. and J.M.Y. wrote the analysis  
544 code, analyzed, and interpreted the data. L.W. and J.M.Y. wrote the manuscript.

545

### 546 **COMPETING INTERESTS**

547 The authors declare no competing interests.

548

### 549 **REFERENCES**

550

- 551 Barlow, H. (1961). Possible principles underlying the transformations of sensory messages. In Rosenblith  
552 W (Ed.), *Sensory communication* (pp. 217–234). Cambridge, MA: MIT.
- 553 Barton, B., Venezia, J. H., Saberi, K., Hickok, G., & Brewer, A. A. (2012). Orthogonal acoustic dimensions  
554 define auditory field maps in human cortex. *Proceedings of the National Academy of Sciences*,  
555 109(50), 20738–20743. [https://doi.org/10.1073/pnas.1213381109/-](https://doi.org/10.1073/pnas.1213381109/-/DCSupplemental)  
556 <https://doi.org/10.1073/pnas.1213381109>
- 557 Bell, J., Bolanowski, S. J., & Holmes, M. H. (1994). The structure and function of Pacinian corpuscles: A  
558 review. *Progress in Neurobiology*, 42, 79–128.
- 559 Bensmaia, S., & Hollins, M. (2005). Pacinian representations of fine surface texture. *Percept Psychophys*,  
560 67(5), 842–854.
- 561 Birznieks, I., McIntyre, S., Nilsson, H. M., Nagi, S. S., Macefield, V. G., Mahns, D. A., & Vickery, R. M.  
562 (2019). Tactile sensory channels over-ruled by frequency decoding system that utilizes spike pattern  
563 regardless of receptor type. *Elife*, 8:e46510.
- 564 Bolanowski, S. J., Gescheider, G. A., Verrillo, R. T., & Checkosky, C. M. (1988). Four channels mediate  
565 the mechanical aspects of touch. *Journal of the Acoustical Society of America*, 84, 1680–1694.
- 566 Bolanowski, S. J., & Verrillo, R. T. (1982). Temperature and criterion effects in a somatosensory  
567 subsystem: a neurophysiological and psychophysical study. *Journal of Neurophysiology*, 48, 836–  
568 855.
- 569 Brisben, A. J., Hsiao, S. S., & Johnson, K. O. (1999). Detection of vibration transmitted through an object  
570 grasped in the hand. *Journal of Neurophysiology*, 81, 1548–1558.
- 571 Burnham, K. P., & Anderson, D. R. (2004). Multimodel inference: Understanding AIC and BIC in model  
572 selection. *Sociological Methods and Research*, 33(2), 261–304.  
573 <https://doi.org/10.1177/0049124104268644>
- 574 Convento, S., Rahman, M. S., & Yau, J. M. (2018). Selective Attention Gates the Interactive Crossmodal

- 575 Coupling between Perceptual Systems. *Current Biology*, 28(5), 746–752.  
576 <https://doi.org/10.1016/j.cub.2018.01.021>
- 577 Cox, R. W. (1996). AFNI: software for analysis and visualization of functional magnetic resonance  
578 neuroimages. *Comput Biomed Res*, 29(3), 162–173.
- 579 Crommett, L. E., Madala, D., & Yau, J. M. (2019). Multisensory Perceptual Interactions Between Higher-  
580 Order Temporal Frequency Signals. *Journal of Experimental Psychology: General*, 148(7), 1124–  
581 1137.
- 582 Crommett, L. E., Perez-Bellido, A., & Yau, J. M. (2017). Auditory adaptation improves tactile frequency  
583 perception. *J Neurophysiol*, 117, 1352–1362. <https://doi.org/10.1152/jn.00783.2016>
- 584 Dale, A. M., Fischl, B., & Sereno, M. I. (1999). Cortical surface-based analysis. I. Segmentation and  
585 surface reconstruction. *Neuroimage*, 9(2), 179–194. <https://doi.org/10.1006/nimg.1998.0395>
- 586 Harvey, M. A., Saal, H. P., Dammann 3rd, J. F., & Bensmaia, S. J. (2013). Multiplexing stimulus  
587 information through rate and temporal codes in primate somatosensory cortex. *PLoS Biol*, 11(5),  
588 e1001558. <https://doi.org/10.1371/journal.pbio.1001558>
- 589 Hudspeth, A. J. (2014). Integrating the active process of hair cells with cochlear function. *Nature Reviews*  
590 *Neuroscience*, 15(9), 600–614. <https://doi.org/10.1038/nrn3786>
- 591 Hughes, C. L., Flesher, S. N., Weiss, J. M., Boninger, M., Collinger, J. L., & Gaunt, R. A. (2021).  
592 Perception of microstimulation frequency in human somatosensory cortex. *Elife*, 10:e65128.
- 593 Johansson, R. S., Landstrom, U., & Lundstrom, R. (1982). Responses of mechanoreceptive afferent units  
594 in the glabrous skin of the human hand to sinusoidal skin displacements. *Brain Research*, 244, 17–  
595 25.
- 596 Klink, P. C., Chen, X., Vanduffel, W., & Roelfsema, P. R. (n.d.). Population receptive fields in non-human  
597 primates from whole-brain fMRI and large-scale neurophysiology in visual cortex. *Elife*.
- 598 Lebedev, M. A., & Nelson, R. J. (1996). High-frequency vibratory sensitive neurons in monkey primary  
599 somatosensory cortex: entrained and nonentrained responses to vibration during the performance of  
600 vibratory-cued hand movements. *Experimental Brain Research*, 111, 313–325.
- 601 Lee, J. H., Wang, X., & Bendor, D. (2020). The role of adaptation in generating monotonic rate codes in  
602 auditory cortex. *PLoS Computational Biology*, 16(2), e1007627.
- 603 Manfredi, L. R., Saal, H. P., Brown, K. J., Zielinski, M. C., Dammann 3rd, J. F., Polashock, V. S., &  
604 Bensmaia, S. J. (2014). Natural scenes in tactile texture. *J Neurophysiol*, 111(9), 1792–1802.  
605 <https://doi.org/10.1152/jn.00680.2013>
- 606 Martino, F. De, Moerel, M., Ugurbil, K., Goebel, R., Yacoub, E., & Formisano, E. (2015). Frequency  
607 preference and attention effects across cortical depths in the human primary auditory cortex.  
608 *Proceedings of the National Academy of Sciences*, 112(52), 16036–16041.  
609 <https://doi.org/10.1073/pnas.1507552112>
- 610 Miller, L. E., Montroni, L., Koun, E., Salemme, R., Hayward, V., & Farnè, A. (2018). Sensing with tools  
611 extends somatosensory processing beyond the body. *Nature*, 561(7722), 239–242.  
612 <https://doi.org/10.1038/s41586-018-0460-0>
- 613 Mountcastle, V. B., Talbot, W. H., Sakata, H., & Hyvärinen, J. (1969). Cortical neuronal mechanisms in  
614 flutter-vibration studied in unanesthetized monkeys. Neuronal periodicity and frequency  
615 discrimination. *Journal of Neurophysiology*, 32(3), 452–484.
- 616 Oldfield, R. C. (1971). The assessment and analysis of handedness: the Edinburgh inventory.  
617 *Neuropsychologia*, 9, 97–113.
- 618 Pei, Y. C., Denchev, P. V., Hsiao, S. S., Craig, J. C., & Bensmaia, S. J. (2009). Convergence of  
619 submodality-specific input onto neurons in primary somatosensory cortex. *J Neurophysiol*, 102(3),  
620 1843–1853.
- 621 Perez-Bellido, A., Barnes, K. A., Crommett, L. E., & Yau, J. M. (2017). Auditory frequency representations  
622 in human somatosensory cortex. *Cerebral Cortex*. <https://doi.org/10.1093/cercor/bhx255>
- 623 Powers, D. M. (2011). Evaluation: From Precision, Recall and F-Measure to ROC, Informedness,  
624 Markness & Correlation. *Journal of Machine Learning Technologies*, 2(1), 37–63.
- 625 Prsa, M., Morandell, K., Cuenu, G., & Huber, D. (2019). Feature-selective encoding of substrate  
626 vibrations in the forelimb somatosensory cortex. *Nature*, 567(7748), 384–388.  
627 <https://doi.org/10.1038/s41586-019-1015-8>
- 628 Rosenbaum, R., Rubin, J., & Doiron, B. (2012). Short Term Synaptic Depression Imposes a Frequency  
629 Dependent Filter on Synaptic Information Transfer. *PLoS Computational Biology*, 8(6), e1002557.  
630 <https://doi.org/10.1371/journal.pcbi.1002557>

- 631 Saal, H. P., & Bensmaia, S. J. (2014). Touch is a team effort: interplay of submodalities in cutaneous  
632 sensibility. *Trends Neurosci*, 37(12), 689–697. <https://doi.org/10.1016/j.tins.2014.08.012>
- 633 Saal, H. P., Harvey, M. A., & Bensmaia, S. J. (2015). Rate and timing of cortical responses driven by  
634 separate sensory channels. *ELife*, 4(DECEMBER2015). <https://doi.org/10.7554/eLife.10450>
- 635 Saal, H. P., Wang, X., & Bensmaia, S. J. (2016). Importance of spike timing in touch: an analogy with  
636 hearing? *Current Opinion in Neurobiology*, 40, 142–149. <https://doi.org/10.1016/j.conb.2016.07.013>
- 637 Schäfer, K., Blankenburg, F., Kupers, R., Grüner, J. M., Law, I., Lauritzen, M., & Larsson, H. B. W.  
638 (2012). Negative BOLD signal changes in ipsilateral primary somatosensory cortex are associated  
639 with perfusion decreases and behavioral evidence for functional inhibition. *NeuroImage*, 59(4),  
640 3119–3127. <https://doi.org/10.1016/j.neuroimage.2011.11.085>
- 641 Shmuel, A., Yacoub, E., Chaimow, D., Logothetis, N. K., & Ugurbil, K. (2007). Spatio-temporal point-  
642 spread function of functional MRI signal in human gray matter. *Neuroimage*, 35(2), 539–552.
- 643 Talbot, W. H., Darian-Smith, I., Kornhuber, H. H., & Mountcastle, V. B. (1968). The sense of flutter-  
644 vibration: comparison of the human capacity with response patterns of mechanoreceptive afferents  
645 from the monkey hand. *Journal of Neurophysiology*, 31, 301–334.
- 646 Wang, X. (2007). Neural coding strategies in auditory cortex. *Hearing Research*, 229, 81–93.
- 647 Yau, J. M., Olenczak, J. B., Dammann, J. F., & Bensmaia, S. J. (2009). Temporal Frequency Channels  
648 Are Linked across Audition and Touch. *Curr Biol*, 19(7), 561–566.
- 649 Yau, J. M., Weber, A. I., & Bensmaia, S. J. (2010). Separate mechanisms for audio-tactile pitch and  
650 loudness interactions. *Front Psychology*, 1(160), doi: 10.3389/fpsyg.2010.00160.
- 651

# **Signatures of vibration frequency tuning in human neocortex**

Lingyan Wang & Jeffrey M. Yau

## **Supplementary Material**

7 Supplementary figures

3 Supplementary tables

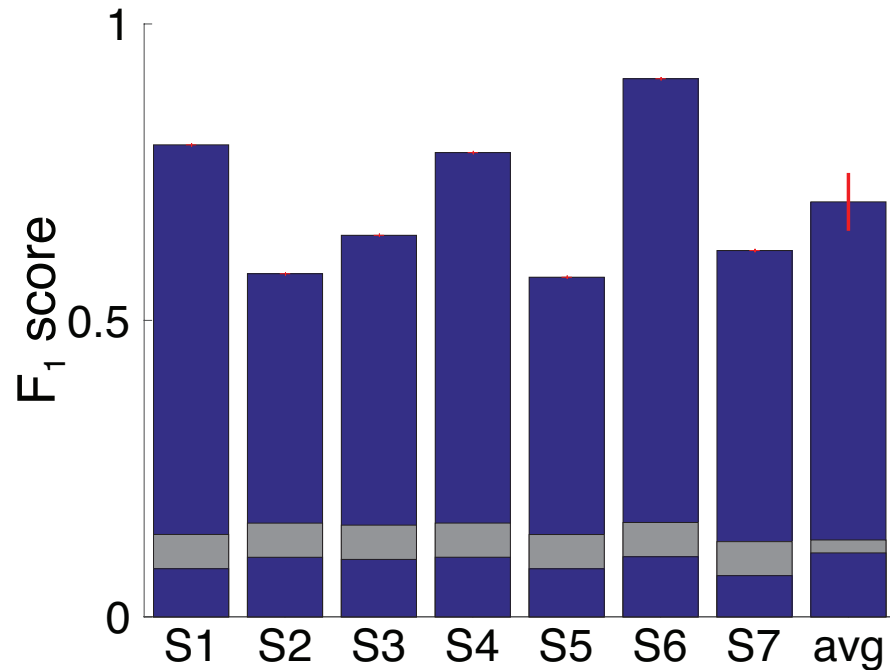

**Supplementary Fig. 1.** Oddball detection performance.  $F_1$  score indexes detection performance by accounting for precision and recall<sup>1</sup>. Higher scores indicate better performance. Bars indicate  $F_1$  score for each participant and the group-averaged score. Red error bar indicates s.e.m. Gray segments indicates the  $F_1$  score distributions expected by chance (center = mean score; thickness = standard deviation) given the number of positive responses provided by each participant (Materials and Methods). Performance in each participant far exceeded chance levels.

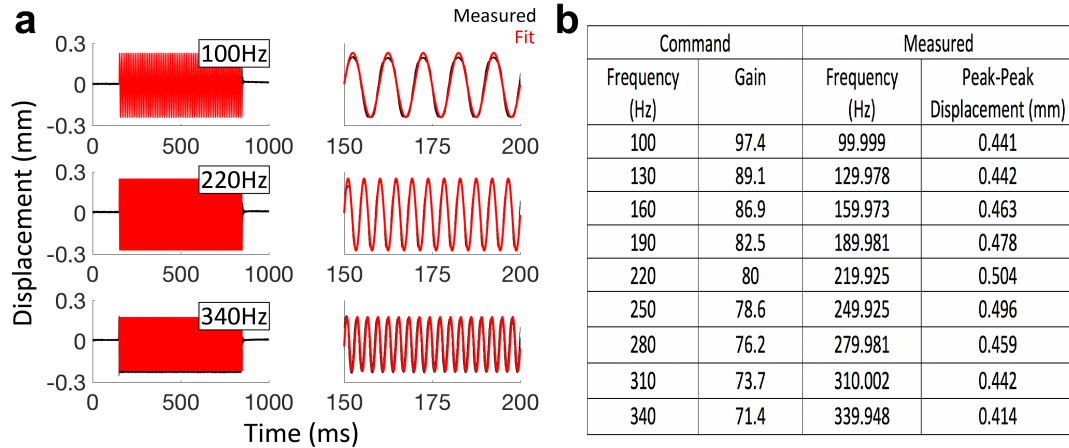

**Supplementary Fig. 2.** Analysis of measured displacement (**a**) Unloaded vibration amplitudes were measured outside of MRI environment using a ZX2-LD50 Laser Displacement Sensor (response time 240 $\mu$ s; acquired by Power 1401 CED with 40kHz sampling rate). Displacement profiles for 10 repeats (black) of the 100-, 220-, and 340-Hz stimuli are shown along with fitted sinusoids (red). Waveforms on the right show cycles from a portion of the full measurements. (**b**) Table indicates command frequencies and gains used to drive stimuli with the Engineering Acoustics, Inc (EAI) controller as well as the measured frequencies and displacements.

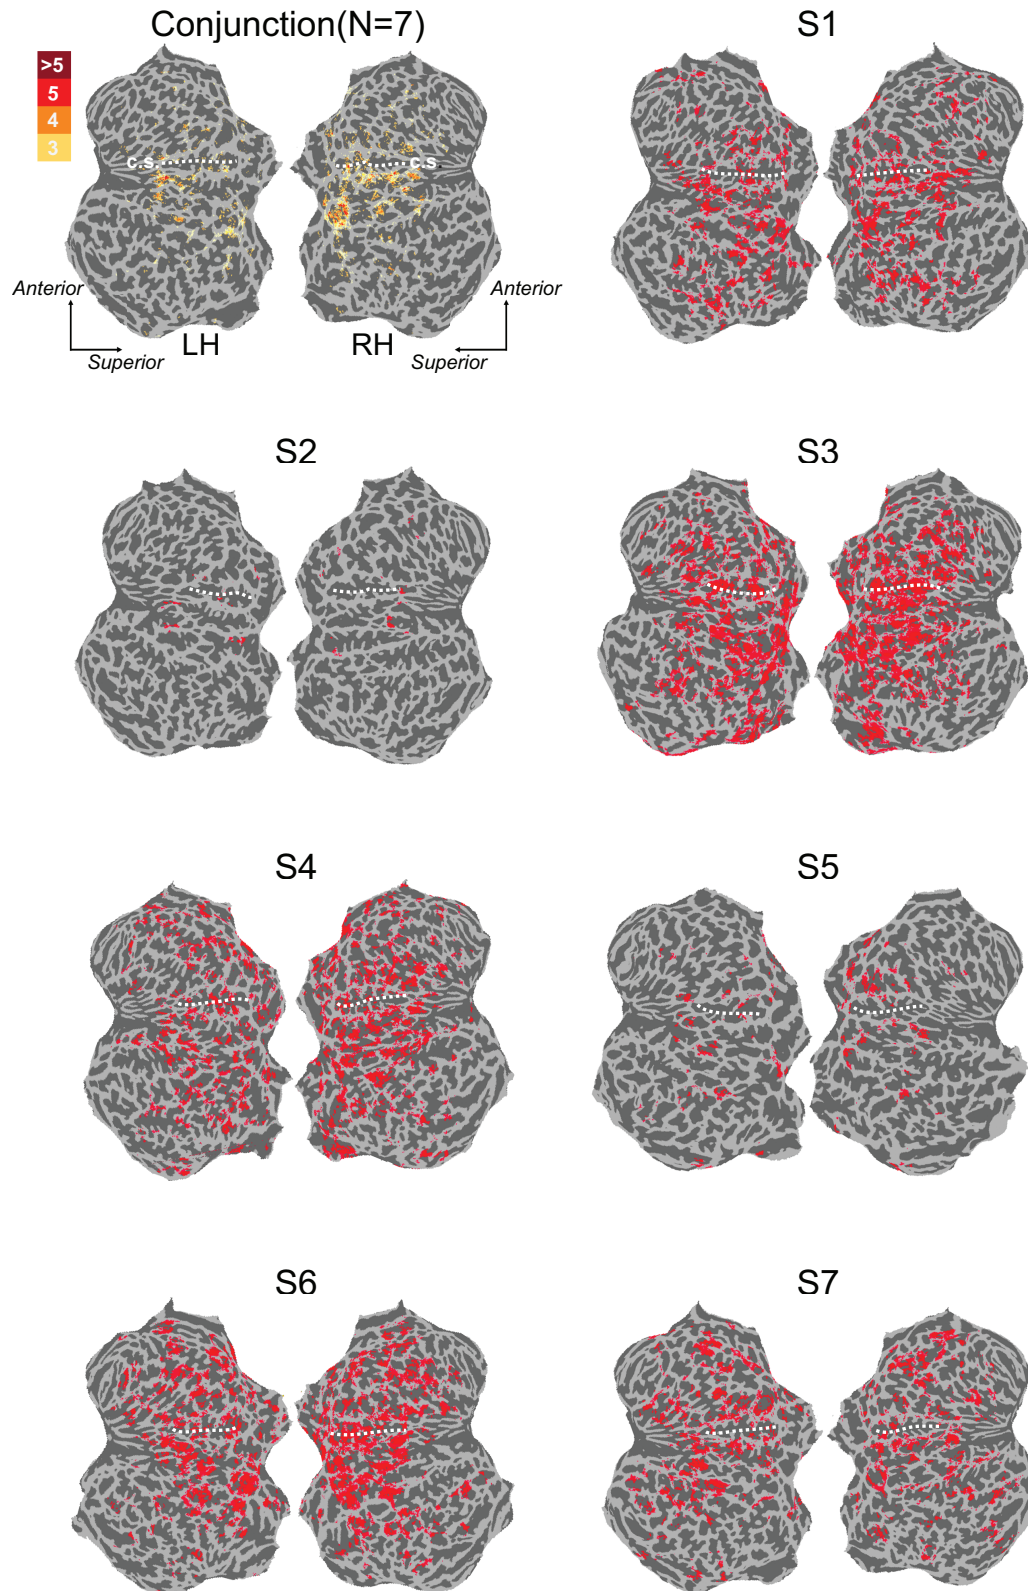

**Supplementary Fig. 3.** Analysis masks for each participant and group summary mask. Labeled surface nodes indicate significant responses to left or right hand vibrations (FDR corrected  $q = 0.0001$ ). Conjunction map indicates nodes with significant activations in 3 or more participants. Dashed white lines indicate the central sulcus (c.s.). LH, left hemisphere; RH, right hemisphere



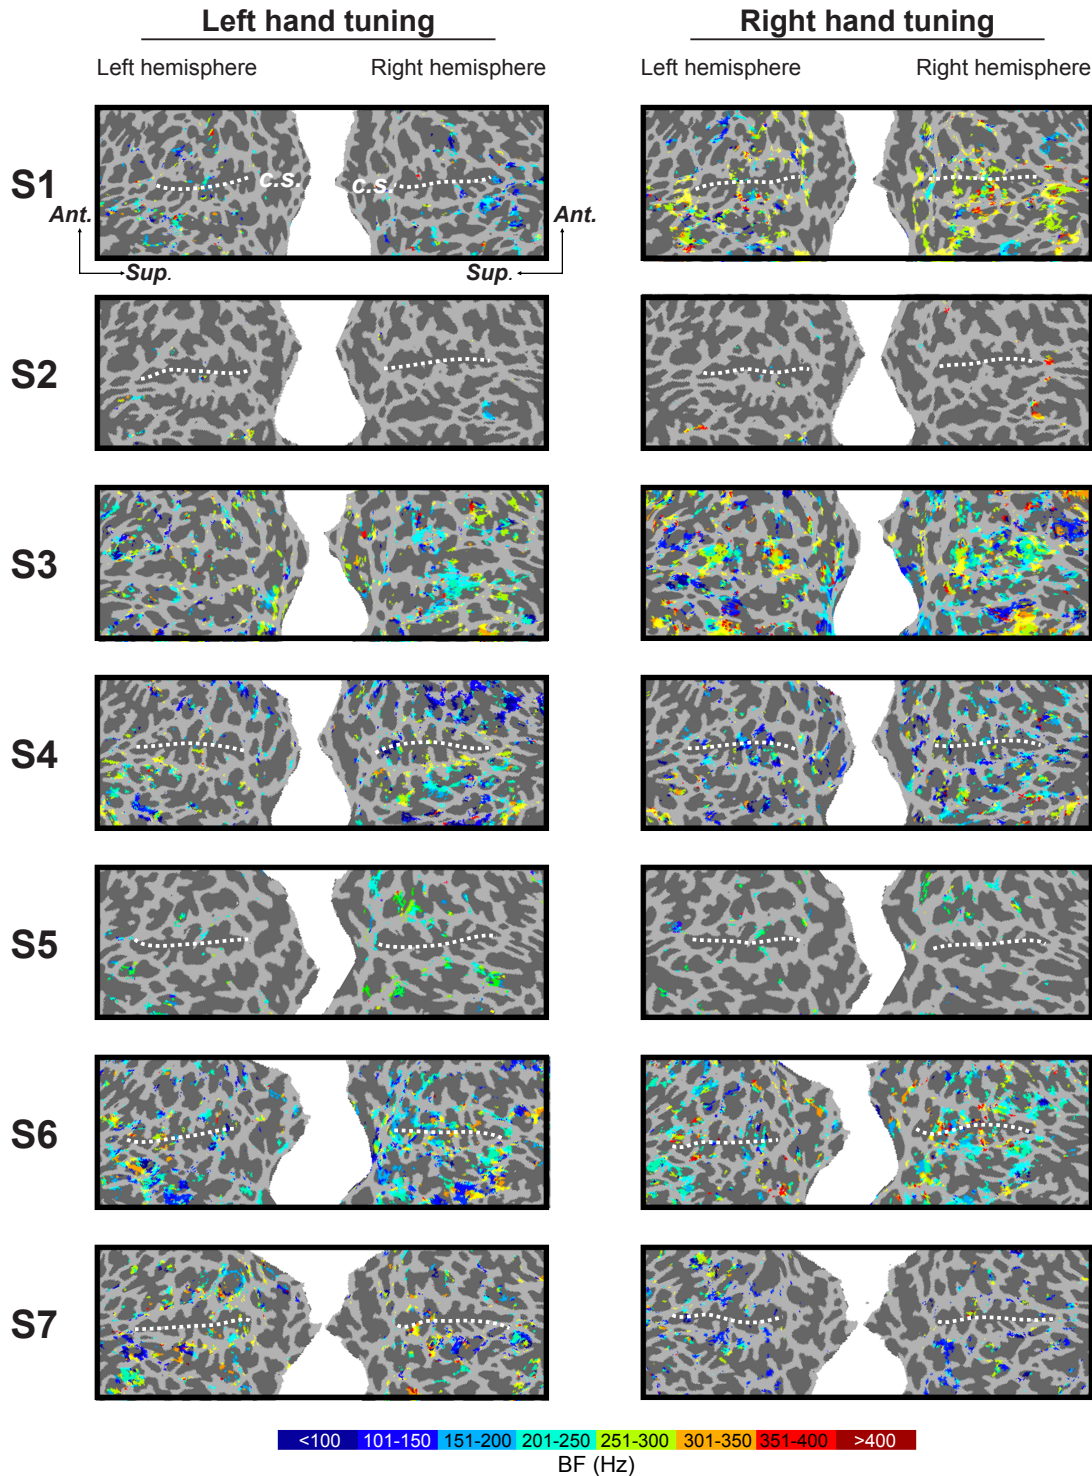

**Supplementary Fig. 4.** Frequency preference maps. Best modulating frequency (BF) for significantly tuned voxels in each participant are projected onto cortical surfaces. Left and right hand tuning is depicted in separate maps. Dashed white lines indicate the central sulcus (c.s.). Ant., anterior; Sup., superior

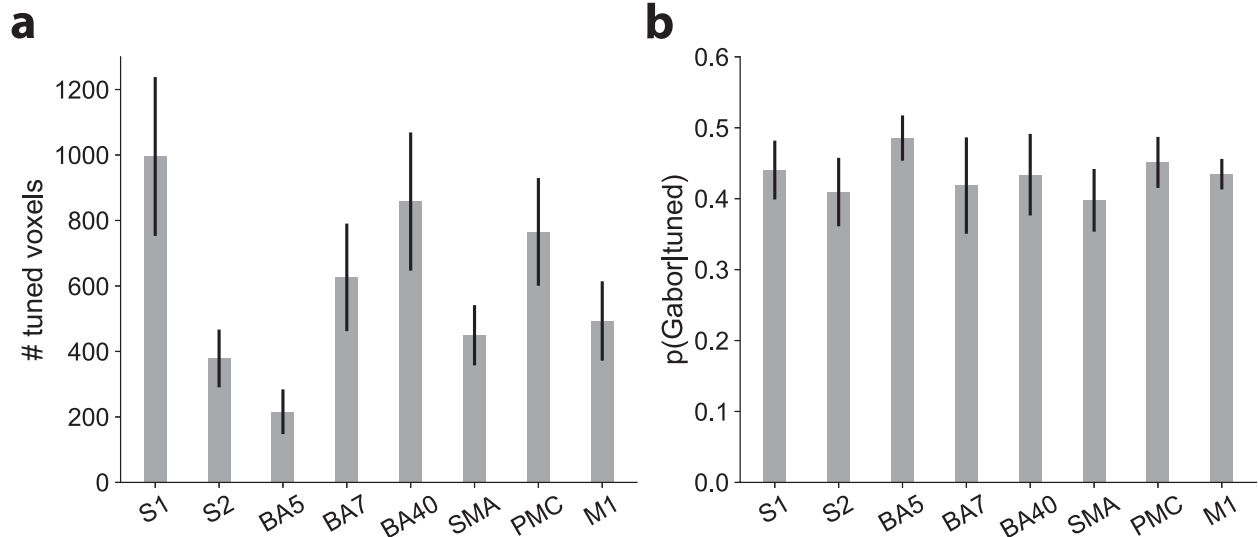

**Supplementary Fig. 5.** Voxel tuning across sensorimotor cortical regions. Regions are defined using Human Connectome Project parcellations<sup>2</sup>. (a) Number of tuned voxels in sensorimotor regions. (b) Proportion of tuned voxels in each sensorimotor region with response profiles more consistent with Gabor tuning rather than Gaussian tuning according to Akaike Information Criterion. BA, Brodmann area; S1, primary somatosensory cortex; S2, secondary somatosensory cortex; SMA, supplementary motor area; PMC, premotor cortex; M1, primary motor cortex.

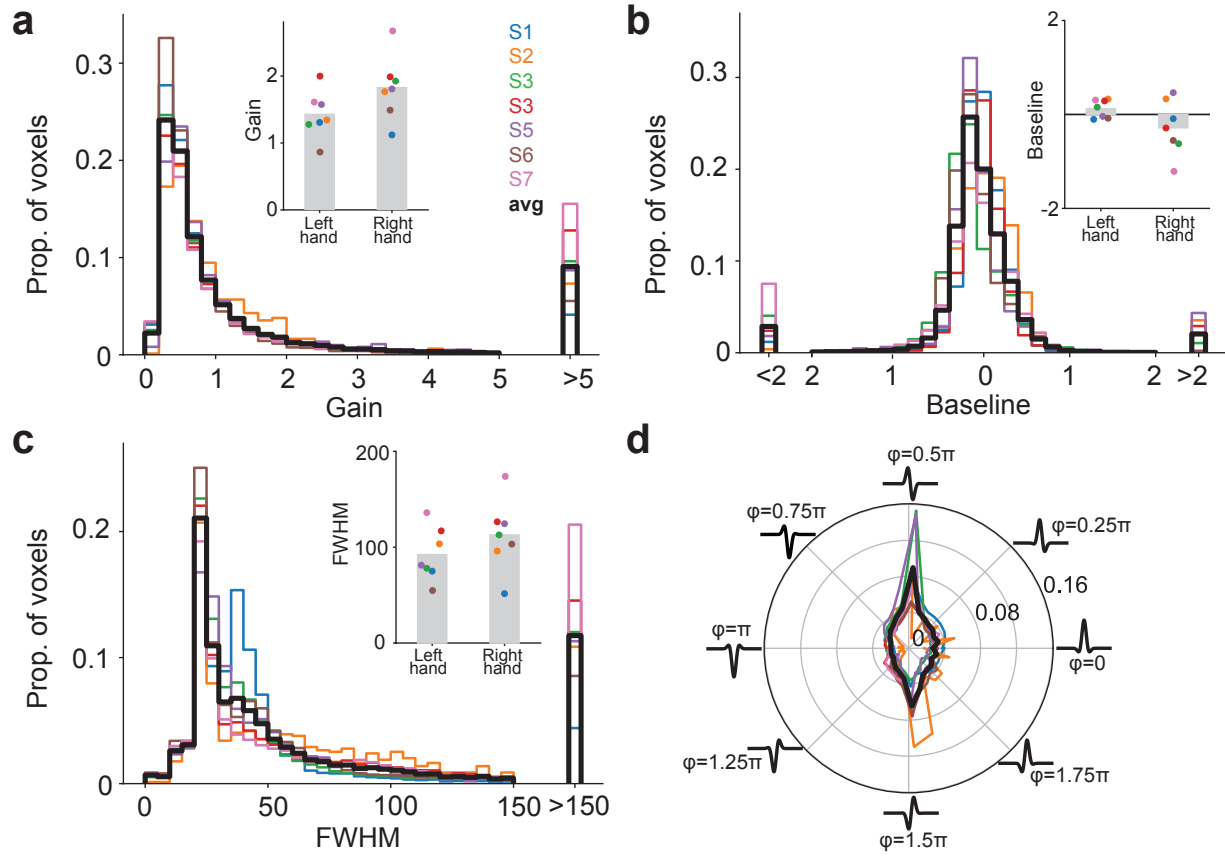

**Supplementary Fig. 6.** Frequency tuning parameters are highly consistent across participants. **(a)** Distribution of gain parameters from Gaussian and Gabor functions fitted to tuned voxels. Black traces indicates group average. Inset shows gain parameters sorted according to left hand and right hand tuning functions. Bars indicates group average and dots indicate individual participant averages. Gains were significantly larger for right hand tuning ( $t(6) = 2.47$ ,  $P = 0.048$ ). **(b)** Distribution of baseline parameters from Gaussian and Gabor functions fitted to tuned voxels. Conventions as in *a*. Baseline values did not differ significantly between hands ( $t(6) = 1.63$ ,  $P = 0.16$ ). **(c)** Distribution of frequency selectivity as indexed by the full-width at half-maximum (FWHM) of the each Gabor or Gaussian tuning function's dominant peak. Conventions as in *a*. FWHM did not differ significantly between hands ( $t(6) = 1.94$ ,  $P = 0.10$ ). **(d)** Distribution of phase parameter values from the Gabor tuning functions. Plotted Gabors indicate canonical profile associated with each phase value. Conventions as in *a*. Although phase distributions differed between hands (Watson's two-sample test of homogeneity;  $U^2 = 0.82-5.66$ ,  $P < 0.001$ ), there was a consistent pattern for non-uniform phase distributions (Rayleigh test,  $P < 1e-15$ ) with peaks at  $\phi = 0.5\pi$  and  $1.5\pi$ .

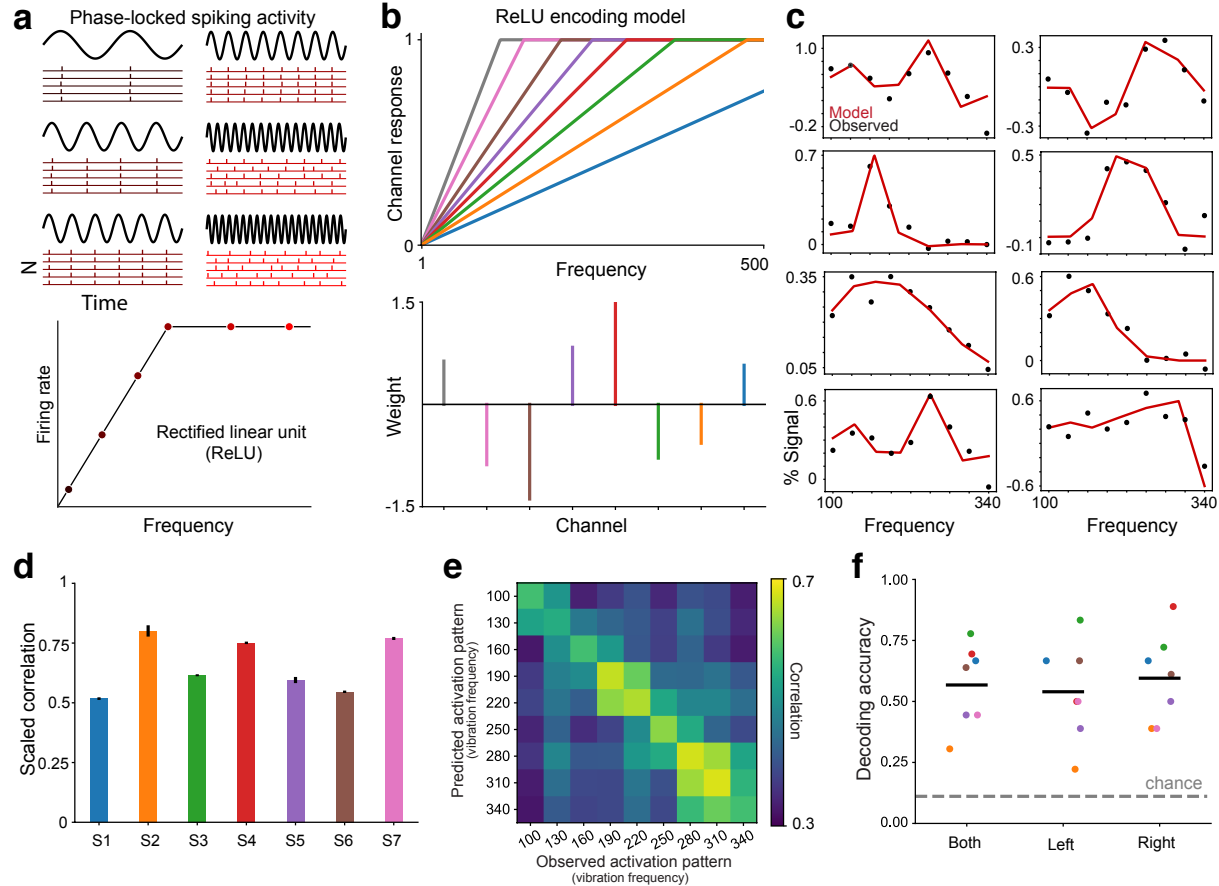

**Supplementary Fig. 7.** Encoding model based on activity of phase-locking neural populations.

(a) Vibration frequency can be encoded in the timing of spiking activity in somatosensory cortical neurons<sup>3-5</sup>. Rasters show idealized activity in neurons whose spikes occur at particular phases of each vibration cycle. At low frequencies, the neurons can fire on every cycle. At high vibration frequencies, phase-locking neurons may skip cycles occurring during their refractory period. Accordingly, the frequency response profile for phase-locking neurons can be described by a low-frequency range over which rates increase monotonically before plateauing at higher frequencies. This profile is captured by a rectified linear activation unit (ReLU). (b) ReLU encoding model assumes that a voxel's response to any given vibration frequency is the weighted sum of the activity in a set of ReLU functions (representing different populations) with different slopes. Slopes are hyperparameters and the weights are estimated in model fitting. Note that the assumption of different slopes implies that the neural populations represented by the ReLU functions are implicitly selective for frequencies. (c) ReLU encoding model (red trace) captures tuned response patterns in example voxels (black dots). (d) Bars indicate voxel-averaged scaled model performance within each participant. The model is trained on one fold of data and tested on a held-out fold. Model performance is the correlation between the model predictions and the test data, normalized by the correlation between the two folds of data (which represent the maximum correlation possible given the noise in the data). Error bars indicate s.e.m. (e) Correlation matrix indicates the similarity between multivoxel activation patterns predicted by the encoding model and the held-out fold. For decoding, the algorithm identifies the model-predicted pattern yielding the highest correlation with an observed pattern to infer the frequency condition. (f) Cross-validated decoding performance for both hands and each hand separately. Black line indicates group averaged accuracy. Colored dots indicate individual participants. Chance performance is 11%.

### Supplementary Table 1 – Number of tuned voxels in the left and right hemispheres

| PARTICIPANT | LEFT<br>HEMISPHERE | RIGHT<br>HEMISPHERE |
|-------------|--------------------|---------------------|
| 1           | 6009               | 6701                |
| 2           | 273                | 321                 |
| 3           | 10357              | 11027               |
| 4           | 7668               | 8024                |
| 5           | 1423               | 1329                |
| 6           | 7974               | 8877                |
| 7           | 6088               | 5446                |

Counts indicate the number of tuned voxels in each participant. Vibration-responsive voxels were considered tuned only if they exhibited reliable across-fold correlations ( $r > 0.2$ ) and significant tuning function fits (FDR corrected  $q < 0.05$ ). A voxel was included in the counts only once regardless of whether it was tuned for both hands.

**Supplementary Table 2 – Number of voxels tuned to the contralateral hand, ipsilateral hand, or both hands**

| PARTICIPANT | CONTRA | IPSI | BOTH |
|-------------|--------|------|------|
| 1           | 5348   | 4986 | 2376 |
| 2           | 148    | 248  | 198  |
| 3           | 8684   | 9267 | 3433 |
| 4           | 6640   | 5646 | 3406 |
| 5           | 1167   | 1152 | 433  |
| 6           | 5917   | 6906 | 4028 |
| 7           | 5370   | 4467 | 1697 |

Counts indicate the number of voxels over the left and right hemispheres in each participant that exhibited tuning only for the contralateral (CONTRA) or the ipsilateral (IPSI) hand. Voxels that were tuned for both hands are indicated in the 3<sup>rd</sup> column.

### Supplementary Table 3 – Voxel-level frequency preferences

| PARTICIPANT | BF MEAN | BF MEDIAN | KS STAT | P VALUE |
|-------------|---------|-----------|---------|---------|
| 1           | 237     | 267       | 0.99    | 1e-15   |
| 2           | 258     | 273       | 0.99    | 1e-15   |
| 3           | 238     | 252       | 0.99    | 1e-15   |
| 4           | 187     | 179       | 0.99    | 1e-15   |
| 5           | 202     | 195       | 0.99    | 1e-15   |
| 6           | 221     | 216       | 0.99    | 1e-15   |
| 7           | 212     | 238       | 0.99    | 1e-15   |

Values indicate best modulating frequency (BF) statistics in each participant. KS, Kolmogorov-Smirnov test statistic

## Supplementary References

1. Powers, D.M. *J. Mach. Learn. Technol.* **2**, 37–63 (2011).
2. Glasser, M.F. et al. *Nature* **536**, 171–178 (2016).
3. Harvey, M.A., Saal, H.P., Dammann 3rd, J.F. & Bensmaia, S.J. *PLoS Biol* **11**, e1001558 (2013).
4. Mountcastle, V.B., Talbot, W.H., Sakata, H. & Hyvärinen, J. *J. Neurophysiol.* **32**, 452–484 (1969).
5. Lebedev, M.A. & Nelson, R.J. *Exp. Brain Res.* **111**, 313–325 (1996).
